# Supplementary material for: Machine Learning-Based Risk Prediction Model for Fatigue in Chronic Heart Failure Patients
Source: Research Square preprint supplement (doi:10.21203/rs.3.rs-8543031/v1), 2026-01-27
Supplement: Supplementary file 1 [file 074568bafbedc683c685286b.docx]

**Questionnaire**

1. **Age:**

①≤30; ②31～50; ③51~65; ④66~80; ⑤≥81

**2. Gender**

①male; ②female

**3.Convenience from the place of residence to the hospital**

①highly inconvenient; ②moderately inconvenient; ③relatively convenient;

④highly convenient

**4. Educational level**

①primary school level and below; ②junior middle school; ③high school;

④university and above

**5. Marital status**

①single; ②married; ③divorced; ④widowed

**6. Occupation**

①famer; ②production and transportation workers; ③enterprise staff; ④medical personnel; ⑤service industry workers; ⑥civil servants; ⑦retirees; ⑧unemployed; ⑨others

**7. Dyspnea**

①yes; ②no

**8. NYHA class**

①Ⅰ; ②Ⅱ; ③Ⅲ;④Ⅳ

**9. LVEF:**

①≤50%; ②＞50%

**10. Cerebrovascular disease**

①yes; ②no

**11. Anemia**

①yes; ②no

**12. Diabetes**

①yes; ②no

**13. Number of comorbidities:**

①＜3; ②3～5; ③＞5

**14. Hypertension**

①yes; ②no

**15. BMI:**

①＜18.5; ②18.50～23.99; ③24.00～27.99; ④≥28

1. **Sleep quality**

①normal; ②bad

1. **Activities of daily living**

①normal; ②disorder

1. **Hemoglobin:**

①＜90; ②90～160; ③＞160

1. **Hematocrit:**
2. **Beta-blockers**

①yes; ②no

1. **Statins**

①yes; ②no

1. **Diuretics**

①yes; ②no

1. **Nitrates**

①yes; ②no

1. **Calcium channel blockers**

①yes; ②no

1. **Psychotropics**

①yes; ②no

1. **Anxiety**

①None; ②Mild; ③severe

1. **Depression**

①None; ②Mild; ③severe

1. **Social support**

①low level; ②middle level; ③hihg level

1. **BNP:**
2. **NT-ProBNP:**
