# Supplementary material for: Machine Learning-Based Risk Prediction Model for Fatigue in Chronic Heart Failure Patients
Source: Research Square preprint supplement (doi:10.21203/rs.3.rs-8543031/v1), 2026-01-27
Supplement: Supplementary file 2 [file 49681ace9d8ab015e41fbb4f.docx]

**Table** Baseline Characteristics of training set and validation set

| Variables | Overall  (n=1171) | Training set (n=819) | Validation set (n=352) | *P* value |
| --- | --- | --- | --- | --- |
| Age, n (%) |  |  |  | 0.944 |
| ≤30  31～50  51~65  66~80  ≥81 | 17 (1.5)  108 (9.2)  330 (28.2)  529 (45.2)  187 (16) | 11 (1.3)  73 (8.9)  229 (28)  373 (45.5)  133 (16.2)) | 6 (1.7)  35 (9.9)  101 (28.7)  156 (44.3)  54 (15.3) |  |
| Gender, n (%) |  |  |  | 0.083 |
| male  female | 680 (58.1)  491(41.9) | 489 (59.7)  330(40.3) | 191 (54.3)  161(45.7) |  |
| Convenience from the place of residence to the hospital, n (%) |  |  |  | 0.465 |
| highly inconvenient  moderately inconvenient  relatively convenient  highly convenient | 211 (18)  318 (27.2)  307 (26.2)  335 (28.6) | 154 (18.8)  224 (27.4)  217 (26.5)  224 (27.4) | 57 (16.2)  94 (26.7)  90 (25.6)  111 (31.5) |  |
| Educational level, n (%) |  |  |  | 0.497 |
| primary school level and below  junior middle school  high school  university and above | 639 (54.6)  265 (22.6)  262 (22.4)  5 (0.4) | 444 (54.2)  184 (22.5)  186 (22.7)  5 (0.6) | 195 (55.4)  81 (23)  76 (21.6)  0 (0) |  |
| Marital status, n (%) |  |  |  | 0.723 |
| single  married  divorced  widowed | 32 (2.7)  887 (75.7)  19 (1.6)  233 (19.9) | 25 (3.1)  620 (75.7)  14 (1.7)  160 (19.5) | 7 (2)  267 (75.9)  5 (1.4)  73 (20.7) |  |
| Occupation, n (%) |  |  |  | 0.737 |
| famer  production and transportation workers  enterprise staff  medical personnel  service industry workers  civil servants  retirees  unemployed  others | 395 (33.7)  26 (2.2)  41 (3.5)  1 (0.1)  10 (0.9)  13 (1.1)  453 (38.7)  201 (17.2)  31 (2.6) | 278 (33.9)  16 (2)  29 (3.5)  1 (0.1)  6 (0.7)  10 (1.2)  326 (39.8)  131 (16)  22 (2.7) | 117 (33.2)  10 (2.8)  12 (3.4)  0 (0)  4 (1.1)  3 (0.9)  127 (36.1)  70 (19.9)  9 (2.6) |  |
| Dyspnea, n (%) |  |  |  | 0.969 |
| yes  no | 498 (42.5)  673 (57.5) | 348 (42.5)  471 (57.5) | 150 (42.6)  202 (57.4) |  |
| NYHA class, n (%) |  |  |  | 0.470 |
| Ⅰ  Ⅱ  Ⅲ  Ⅳ | 59 (5)  546 (46.6)  452 (38.6)  114 (9.7) | 46 (5.6)  384 (46.9)  313 (38.2)  76 (9.3) | 13 (3.7)  162 (46)  139 (39.5)  38 (10.8) |  |
| LVEF, n (%) |  |  |  | 0.249 |
| ≤50%  ＞50% | 685 (58.5)  486 (41.5) | 488 (59.6)  331 (40.4) | 197 (56)  155 (44) |  |
| Cerebrovascular disease, n (%) |  |  |  | 0.798 |
| yes  no | 134 (11.4)  1037 (88.6) | 39 (11.1)  313 (88.9) | 134 (11.4)  1037 (88.6) |  |
| Anemia, n (%) |  |  |  | 0.575 |
| yes  no | 91 (7.8)  1080 (92.2) | 66 (8.1)  753 (91.9) | 25 (7.1)  327 (92.9) |  |
| Diabetes, n (%) |  |  |  | 0.686 |
| yes  no | 265 (22.6)  906 (77.4) | 188 (23)  631 (77) | 77 (21.9)  275 (78.1) |  |
| Number of comorbidities, n (%) |  |  |  | 0.558 |
| ＜3  3～5  ＞5 | 483 (41.2)  565 (48.2)  123 (10.5) | 343 (41.9)  387 (47.3)  89 (10.9) | 140 (39.8)  178 (50.6)  34 (9.7) |  |
| Hypertension, n (%) |  |  |  | 0.561 |
| yes  no | 577 (49.3)  594 (50.7) | 399 (48.7)  420 (51.3) | 178 (50.6)  174 (49.4) |  |

**Table S1 ((continued)**

| Variables | | Overall  (n=1171) | Training set (n=819) | Validation set (n=352) | *P* value |
| --- | --- | --- | --- | --- | --- |
| BMI, n (%) |  |  |  | 0.007 |
| ＜18.5  18.50～23.99  24.00～27.99  ≥28 | 124 (10.6)  568 (48.5)  333 (28.4)  146 (12.5) | 82 (10)  422 (51.5)  212 (25.9)  103 (12.6) | 42 (11.9)  146 (41.5)  121 (34.4)  43 (12.2) |  |
| Sleep quality, n (%) |  |  |  | 0.782 |
| normal  bad | 399 (34.1)  772 (65.9) | 277 (33.8)  542 (66.2) | 122 (34.7)  230 (65.3) |  |
| Activities of daily living, n (%) |  |  |  | 0.870 |
| normal  disorder | 1090 (93.1)  81 (6.9) | 763 (93.2)  56 (6.8) | 327 (92.9)  25 (7.1) |  |
| Hemoglobin, n (%) |  |  |  | 0.825 |
| ＜90  90～160  ＞160 | 80 (6.8)  905 (77.3)  186 (15.9) | 55 (6.7)  637 (77.8)  127 (15.5) | 25 (7.1)  268 (76.1)  59 (16.8) |  |
| Hematocrit (median [IQR],vol%) | 42 (37,47) | 42 (37,47) | 42 (37,47) | 0.847 |
| Beta-blockers, n (%) |  |  |  | 0.667 |
| yes  no | 741 (63.3)  430 (36.7) | 515 (62.9)  304 (37.1) | 226 (64.2)  126 (35.8) |  |
| Statins, n (%) |  |  |  | 0.349 |
| yes  no | 641 (54.7)  530 (45.3) | 441 (53.8)  378 (46.2) | 200 (56.8)  152 (43.2) |  |
| Diuretics, n (%) |  |  |  | 0.139 |
| yes  no | 980 (83.7)  191 (16.3) | 694 (84.7)  125 (15.3) | 286 (81.2)  66 (18.8) |  |
| Nitrates, n (%) |  |  |  | 0.433 |
| yes  no | 67 (5.7)  1104 (94.3) | 44 (5.4)  775 (94.6) | 23 (6.5)  329 (93.5) |  |
| Calcium channel blockers, n (%) |  |  |  | 0.018 |
| yes  no | 122 (10.4)  1049 (89.6) | 74 (9)  745 (91) | 48 (13.6)  304 (86.4) |  |
| Psychotropics, n (%) |  |  |  | 0.646 |
| yes  no | 103 (8.8)  1068 (91.2) | 70 (8.5)  749 (91.5) | 33 (9.4)  319 (90.6) |  |
| Anxiety, n (%) |  |  |  | 0.11 |
| None  Mild  severe | 961 (82.1)  150 (12.8)  60 (5.1) | 671 (81.9)  112 (13.7)  36 (4.4) | 290 (82.4)  38 (10.8)  24 (6.8) |  |
| Depression, n (%) |  |  |  | 0.369 |
| None  Mild  severe | 955 (81.6)  156 (13.3)  60 (5.1) | 673 (82.2)  102 (12.5)  44 (5.4) | 282 (80.1)  54 (15.3)  16 (4.5) |  |
| Social support, n (%) |  |  |  | 0.452 |
| low level  middle level  hihg level | 61 (5.2)  1082 (92.4)  28 (2.4) | 47 (5.7)  753 (91.9)  19 (2.3) | 14 (4)  329 (93.5)  9 (2.6) |  |
